# Supplementary material for: Coronin 1C harbours a second actin-binding site that confers co-operative binding to F-actin
Source: PubMed Central journal article supplement — Biochem J. 2012 Apr 26;444(Pt 1):89–96. doi: 10.1042/BJ20120209 (PMC3339874; doi:10.1042/bj20120209), 2012-04-26
Supplement: bj4440089add.pdf [file bj4440089add.pdf]

SUPPLEMENTARY ONLINE DATA

Coronin 1C harbours a second actin-binding site that confers co-operative binding to F-actin

Keefe T. CHAN\*†, David W. ROADCAP\*, Nicholas HOLOWECKYJ\* and James E. BEAR\*†<sup>1</sup>

\*Lineberger Comprehensive Cancer Center and Department of Cellular and Developmental Biology, University of North Carolina at Chapel Hill, NC 27599, U.S.A., and †Howard Hughes Medical Institute, University of North Carolina at Chapel Hill, NC 27599, U.S.A.

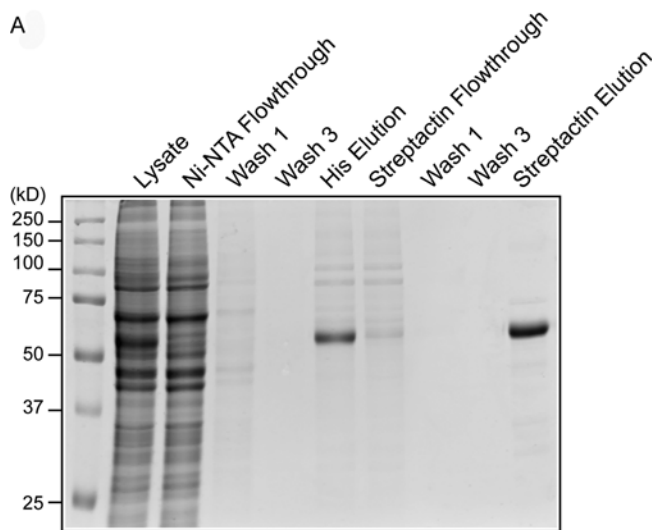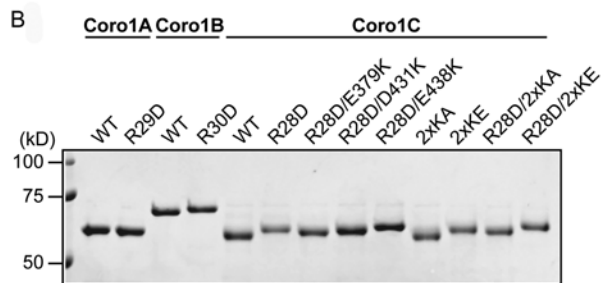

Figure S1 Purification of mammalian Coro1 proteins

(A) Coomassie Blue-stained gel shows purification steps for recombinant Coro1C, which contains a C-terminal Strep–His<sub>6</sub> tag. (B) Purified wild-type (WT) and mutant coronin proteins (0.5 μg) used for *in vitro* studies were separated by SDS/PAGE and subjected to Coomassie Blue staining. Molecular masses are shown in kDa on the left-hand side. Ni-NTA, Ni<sup>2+</sup>-nitrilotriacetate.

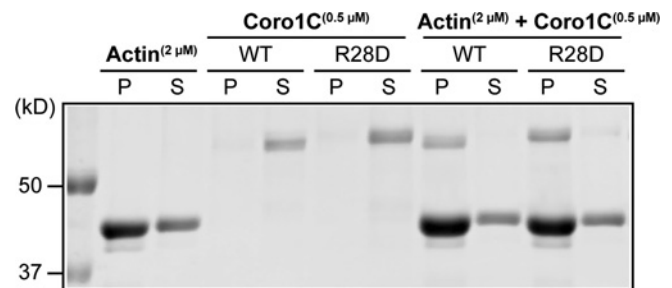

Figure S2 Actin cosedimentation control for Coro1C and Coro1C–R28D

Cosedimentation assays were performed using 0.5 μM Coro1C or Coro1C–R28D with and without 2 μM actin. Pellet (P) and supernatant (S) fractions were analysed by SDS/PAGE and subjected to Coomassie Blue staining. Molecular masses are shown in kDa on the left-hand side. WT, wild-type.

<sup>1</sup> To whom correspondence should be addressed (email jbear@email.unc.edu).

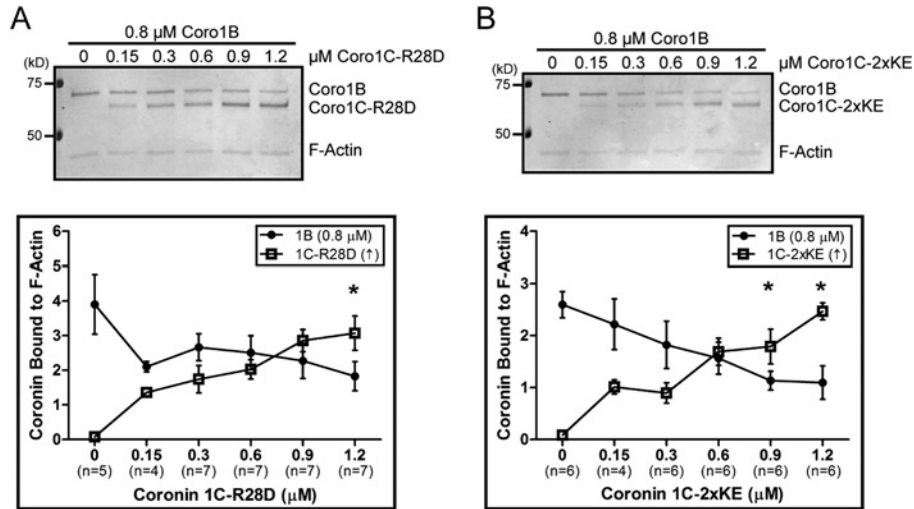

**Figure S3 Coroin1B competes with Coro1C–R28D and Coro1C–2xKE for binding to F-actin**

Coroin1B ( $0.8 \mu\text{M}$ ) was incubated with actin ( $0.3 \mu\text{M}$ ) for 1 h followed by incubation with increasing concentrations of Coro1C–R28D (A) or Coro1C–2xKE (B). Actin cosedimentation was performed and pellet fractions were subjected to SDS/PAGE and Coomassie Blue staining. Quantification of the relative amount of Coroin bound to F-actin from the indicated number of independent experiments ( $n$ ) is shown as means  $\pm$  S.E.M. \* $P < 0.05$  determined by one-way ANOVA as compared with the initial concentration of coroin. Molecular masses are shown in kDa on the left-hand side of the gels.

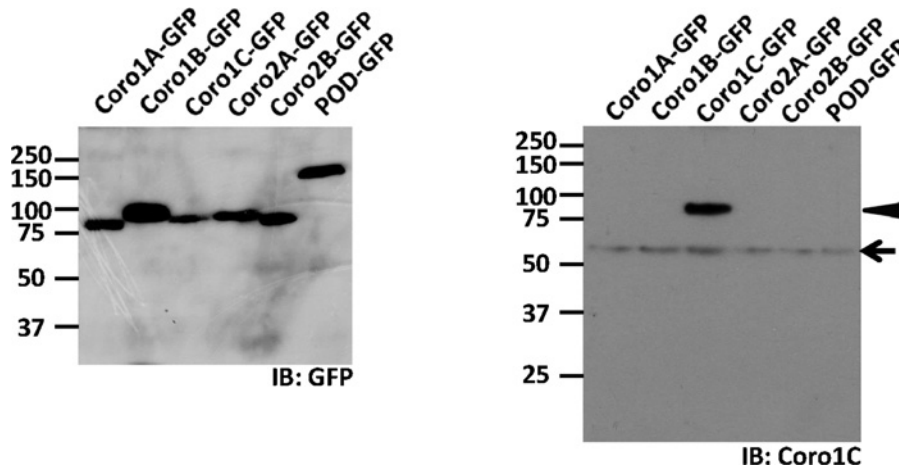

**Figure S4 Specificity of anti-Coroin1C antibody**

(A) Lysates of HEK (human embryonic kidney)-293FT cells expressing GFP fusions of Coro1A, Coro1B, Coro1C, Coro2A, Coro2B or POD (polarity-osmotic defective) were separated by SDS/PAGE and analysed by immunoblotting (IB) with anti-GFP or anti-Coroin1C antibodies. Arrow indicates endogenous Coro1C and arrowhead denotes Coro1C–GFP. Molecular masses are shown in kDa on the left-hand side.

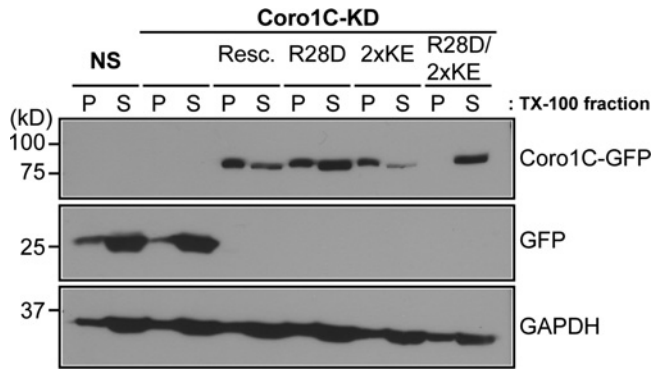

**Figure S5 Analysis of Coro1C association with the detergent-insoluble cytoskeleton**

IA32 mouse fibroblasts were infected with lentivirus expressing NS shRNA (GFP), Coro1C shRNA (Coro1C-KD) or Coro1C shRNA and re-expressing Coro1C-GFP (resc.) or R28D, 2xKE, R28D/2xKE mutants. Cells were lysed in RIPA buffer containing 1% Triton X-100 (TX-100) and subjected to centrifugation at 14000 **g** for 10 min. Detergent-insoluble pellets (P) and supernatants (S) were separated by SDS/PAGE and analysed by immunoblotting with an anti-GFP antibody. GAPDH (glyceraldehyde-3-phosphate dehydrogenase) was probed as a loading control. Molecular masses are shown in kDa on the left-hand side.

Received 2 February 2012/23 February 2012; accepted 27 February 2012  
 Published as BJ Immediate Publication 27 February 2012, doi:10.1042/BJ20120209
